# Supplementary material for: Nickel oxide interlayer films from nickel formate–ethylenediamine precursor: influence of annealing on thin film properties and photovoltaic device performance
Source: Royal Society of Chemistry journal article supplement (doi:10.1039/c5ta01379h), 2015-01-01
Supplement: c5ta01379h1.pdf [file c5ta01379h1.pdf]

## Supporting Information

### Nickel oxide interlayer films from nickel formate-ethylenediamine precursor: Influence of annealing on thin film properties and photovoltaic device performance

Cite this: DOI: 10.1039/x0xx00000x

Received 00th January 2012,  
Accepted 00th January 2012

DOI: 10.1039/x0xx00000x

www.rsc.org/

K. X. Steirer,<sup>a,c,d\*</sup> R. E. Richards,<sup>a</sup> A. K. Sigdel,<sup>b,c‡</sup> A. Garcia,<sup>c†</sup> P. F. Ndione,<sup>c</sup> S. Hammond,<sup>c</sup> D. Baker,<sup>d#</sup> E. L. Ratcliff,<sup>c</sup> C. Curtis,<sup>c</sup> T. Furtak,<sup>d</sup> D. S. Ginley,<sup>c</sup> D. C. Olson,<sup>c</sup> N. R. Armstrong,<sup>a</sup> J. J. Berry,<sup>3\*</sup>

### Supporting Information

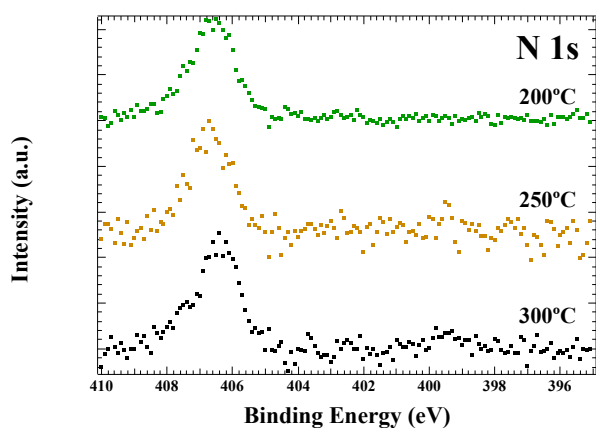

S1: N 1s spectra for 200°C, 250°C and 300°C anneals showing the presence and high binding energy of N 1s photoelectrons. Spectra have been normalized.

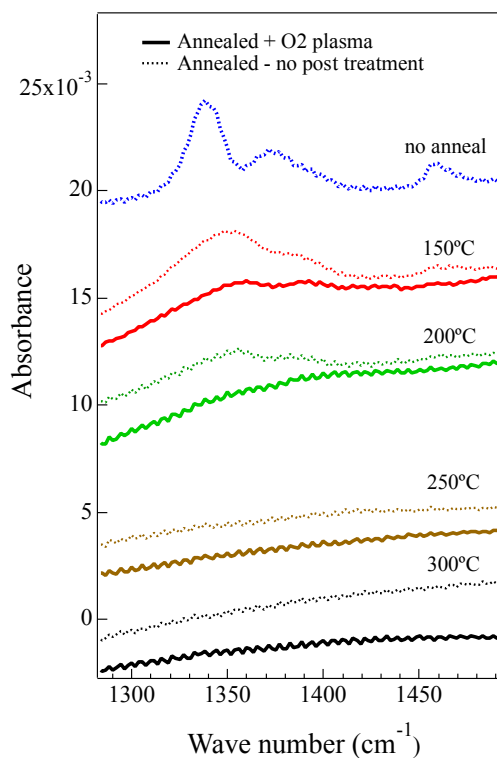

S2: FTIR of NiOx films that were annealed at temperatures shown with and without O<sub>2</sub>-plasma post-treatment. The main peak in the no anneal film is due to the symmetric stretch mode,  $\nu_s(\text{COO})$  from nickel formate. Note the shift to higher wavenumbers as the films are annealed and O<sub>2</sub>-plasma treated.

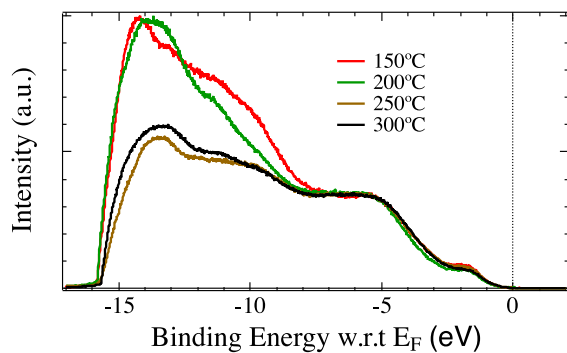

**S3:** UPS of spin-cast (NiO<sub>x</sub>) thin films on ITO after annealing at the temperatures shown. All films received O<sub>2</sub>-plasma treatment after annealing. Spectra are normalized to the O 2p photoemission features near -5.5 eV. Features between -7 eV and -14 eV may arise from N in the lower temperature (150°C and 200°C) annealed samples.

## Notes and references

a Department of Chemistry and Biochemistry, University of Arizona, Tucson, Arizona, USA.

b Department of Physics and Astronomy, University of Denver, Denver, Colorado, USA.

c National Renewable Energy Laboratory, Golden, Colorado, USA.

d Applied Physics Department, Colorado School of Mines, Golden, Colorado, USA.

e Department of Materials Science and Engineering, University of Arizona, Tucson, Arizona, USA.

‡ Present address: Intel Corporation, Portland, OR, USA.

† Present address: Next Energy Technologies Inc. Santa Barbara, CA, USA.

# Present address: Washington Nanofabrication Facility at the University of Washington, Seattle WA, USA.
